# Supplementary material for: In Vitro Neuroprotective and Anti-Inflammatory Activities of Natural and Semi-Synthetic Spirosteroid Analogues
Source: PubMed Central journal article supplement (PMC6274191; doi:10.3390/molecules21080992), 2016-07-29
Supplement: molecules-21-00992-s001.pdf [file molecules-21-00992-s001.pdf]

# Supplementary Material: In Vitro Neuroprotective and Anti-Inflammatory Activities of Natural and Semi-Synthetic Spirosteroid Analogues

Laura García-Pupo, Armando Zaldo-Castro, Vassiliki Exarchou, Juan Enrique Tacoronte-Morales, Luc Pieters, Wim Vanden Berghe, Yanier Nuñez-Figueroa and René Delgado-Hernández

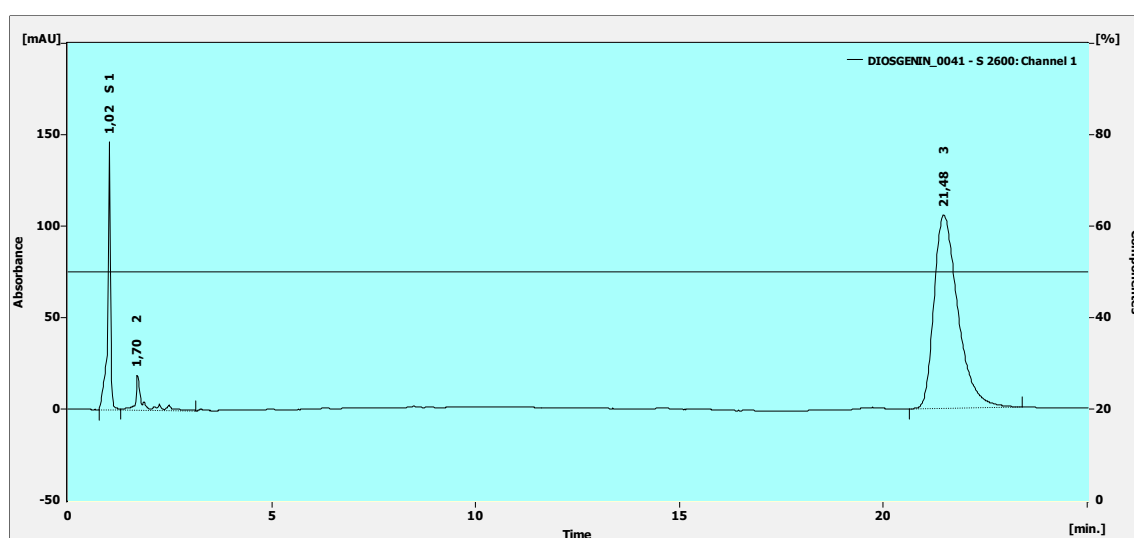

(A)

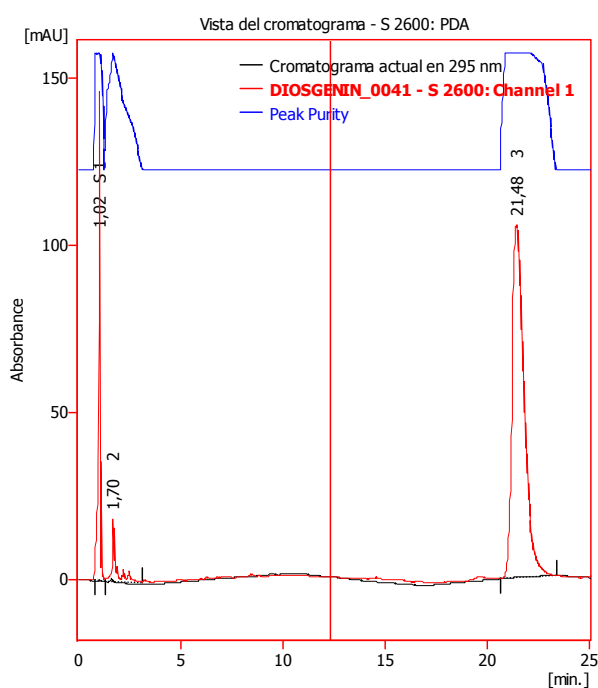

(B)

**Figure S1.** Relative quantification of Diosgenin purity by HPLC. (A) Chromatogram of the HPLC run and (B) HPLC chromatogram with a photodiode array(PDA) analysis of peak purity.

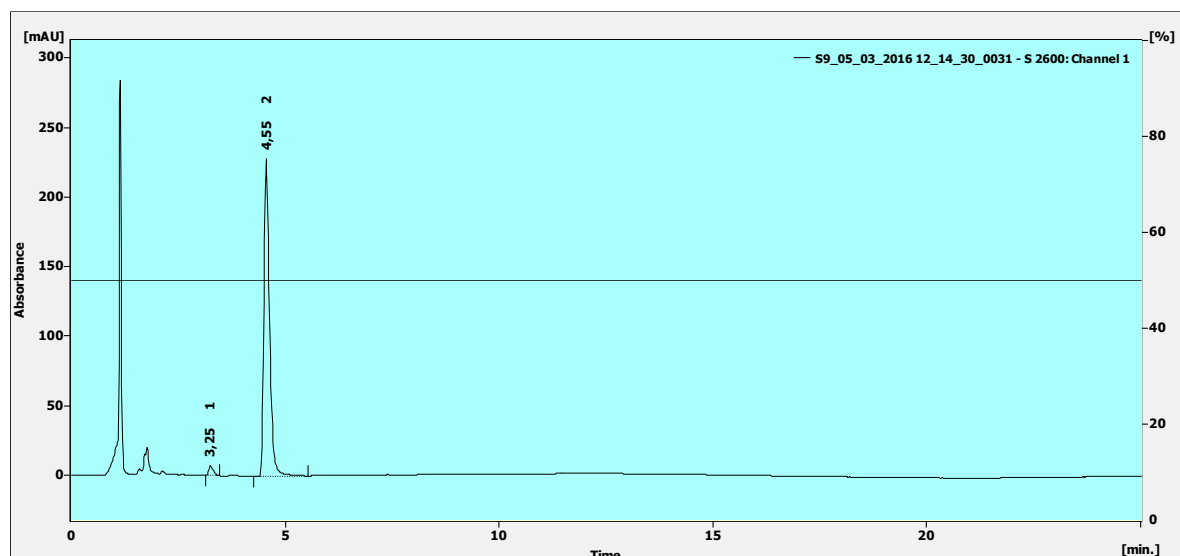

(A)

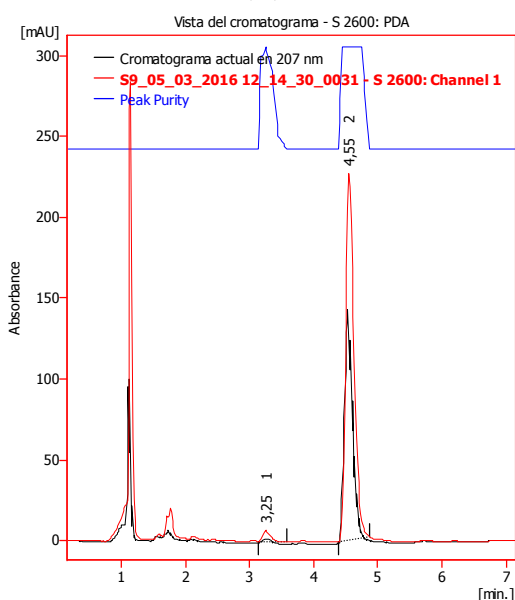

(B)

**Figure S2.** Relative quantification of compound S9 purity by HPLC. (A) Chromatogram of the HPLC run and (B) HPLC chromatogram with a photodiode array(PDA) analysis of peak purity.

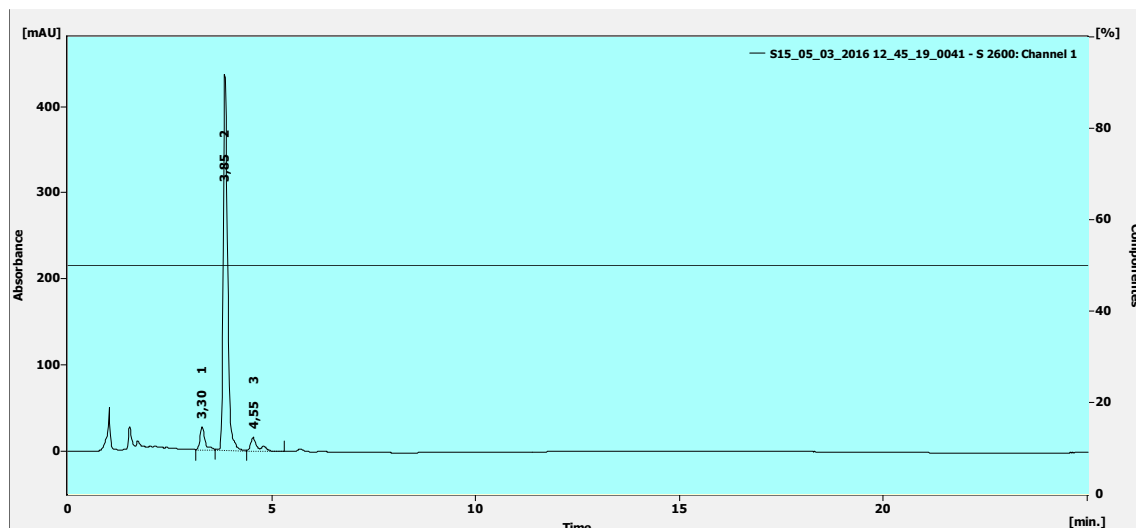

(A)

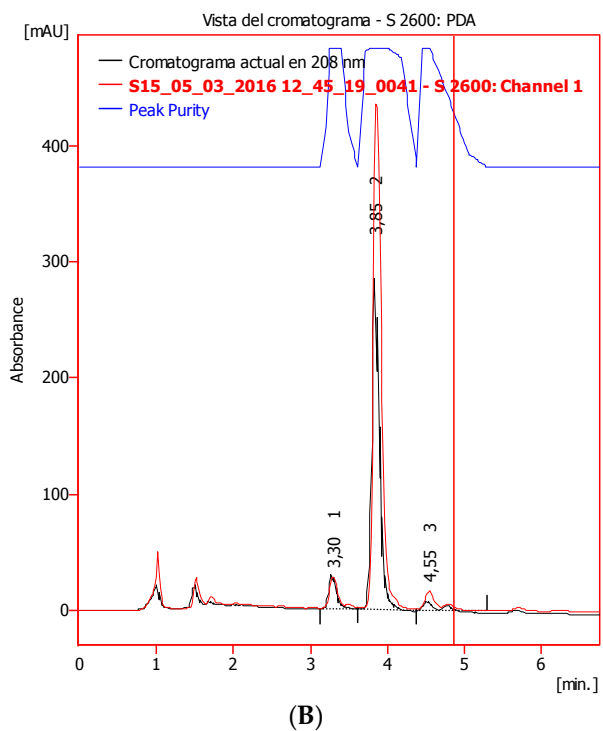

**Figure S3.** Relative quantification of compound S15 purity by HPLC. (A) Chromatogram of the HPLC run and (B) HPLC chromatogram with a photodiode array(PDA) analysis of peak purity.

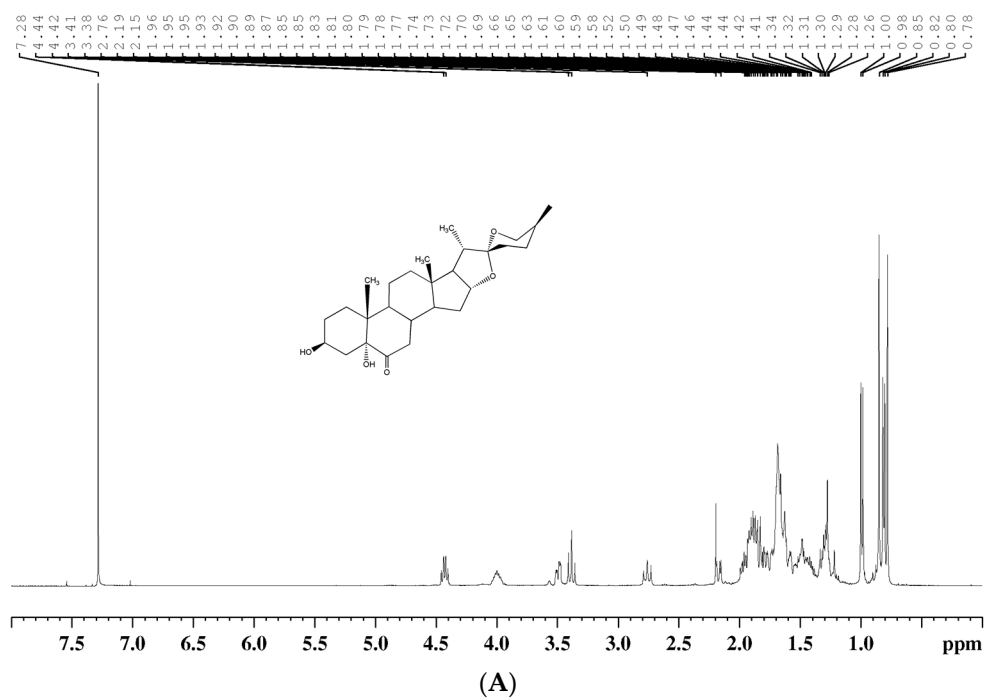

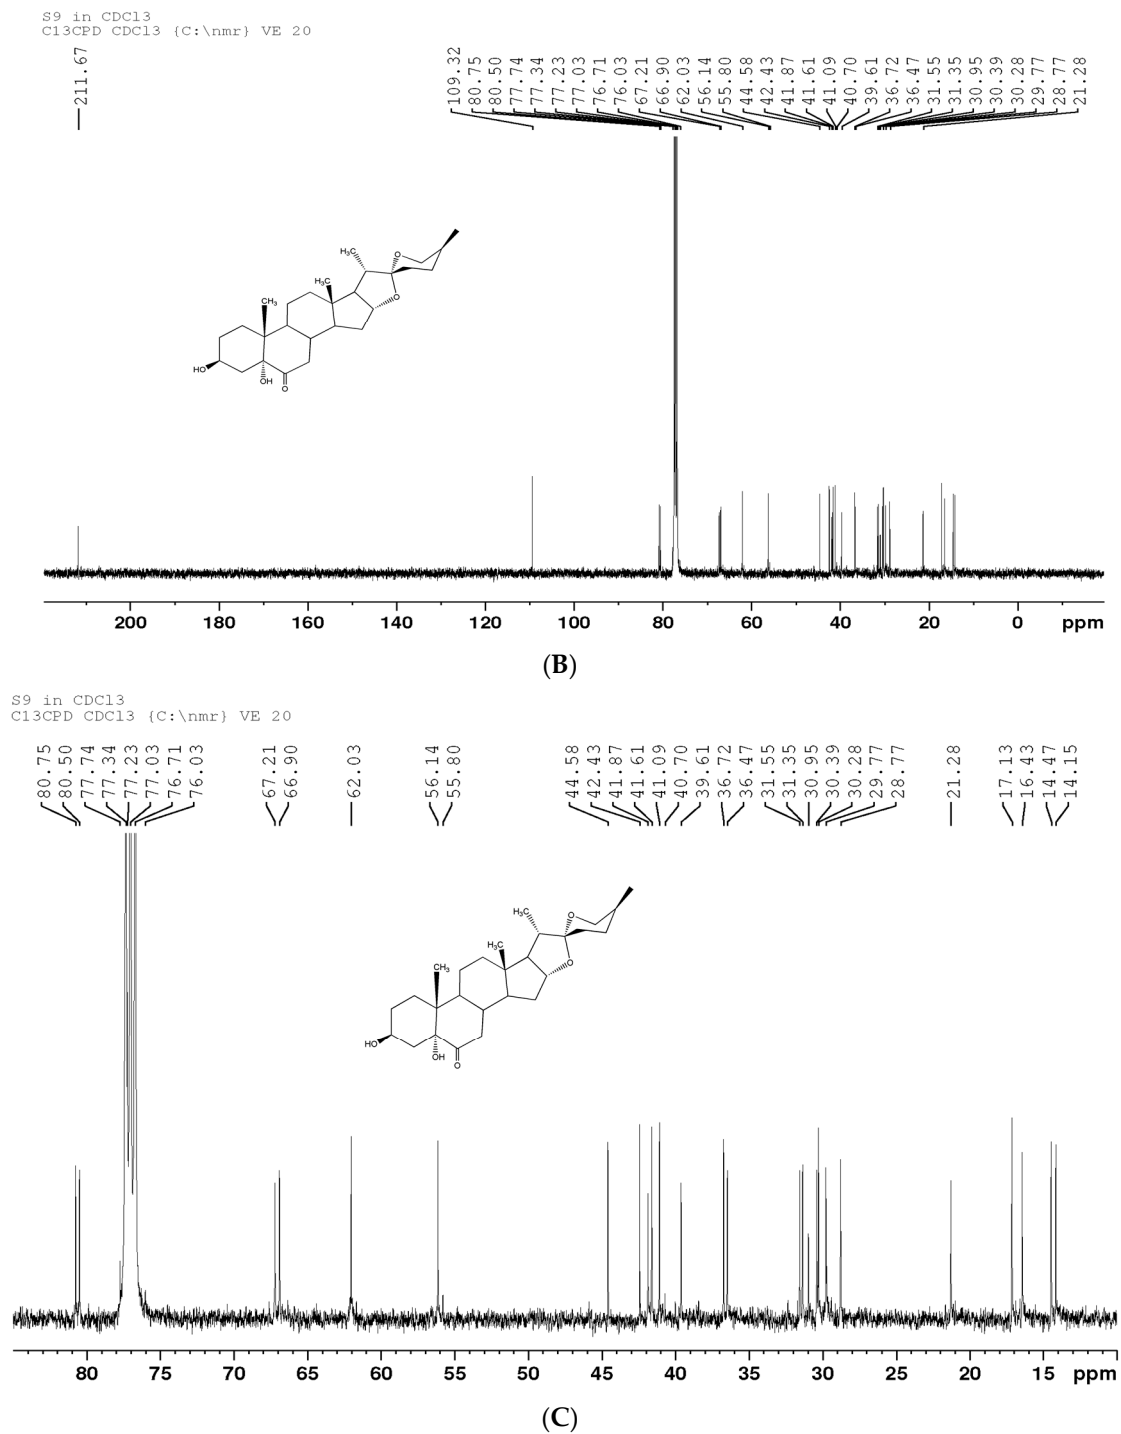

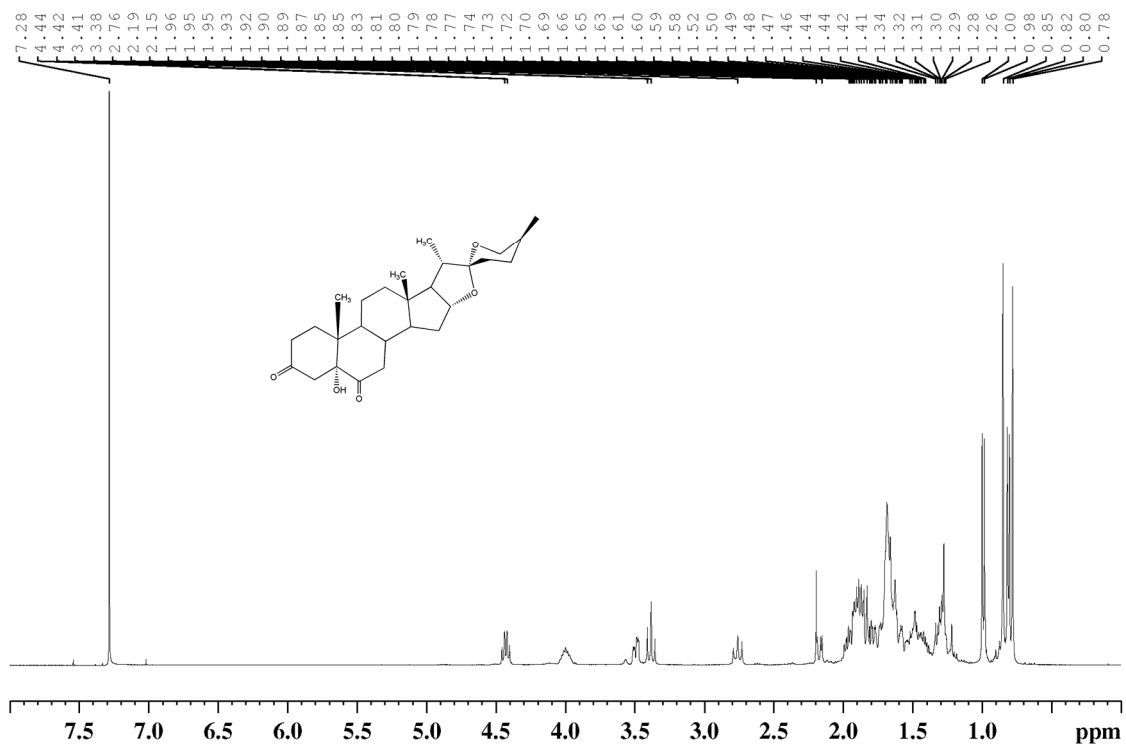

(A)

S10 in CDCl<sub>3</sub>  
C13CPD CDCl<sub>3</sub> (C:\nmr) VE 56

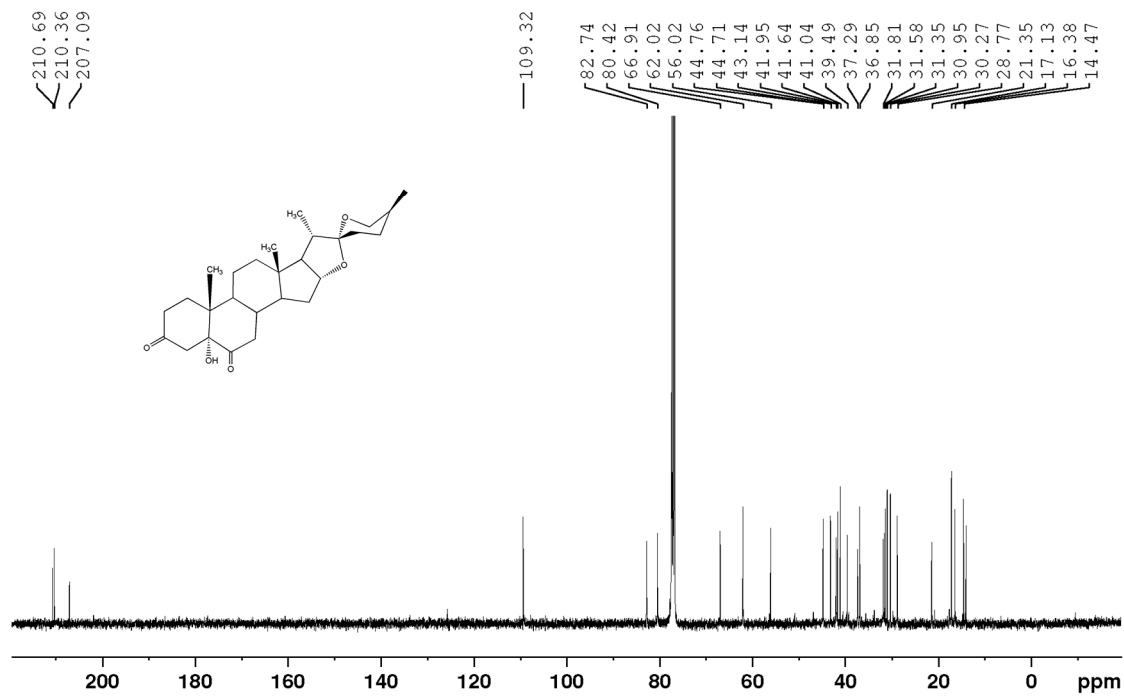

(B)

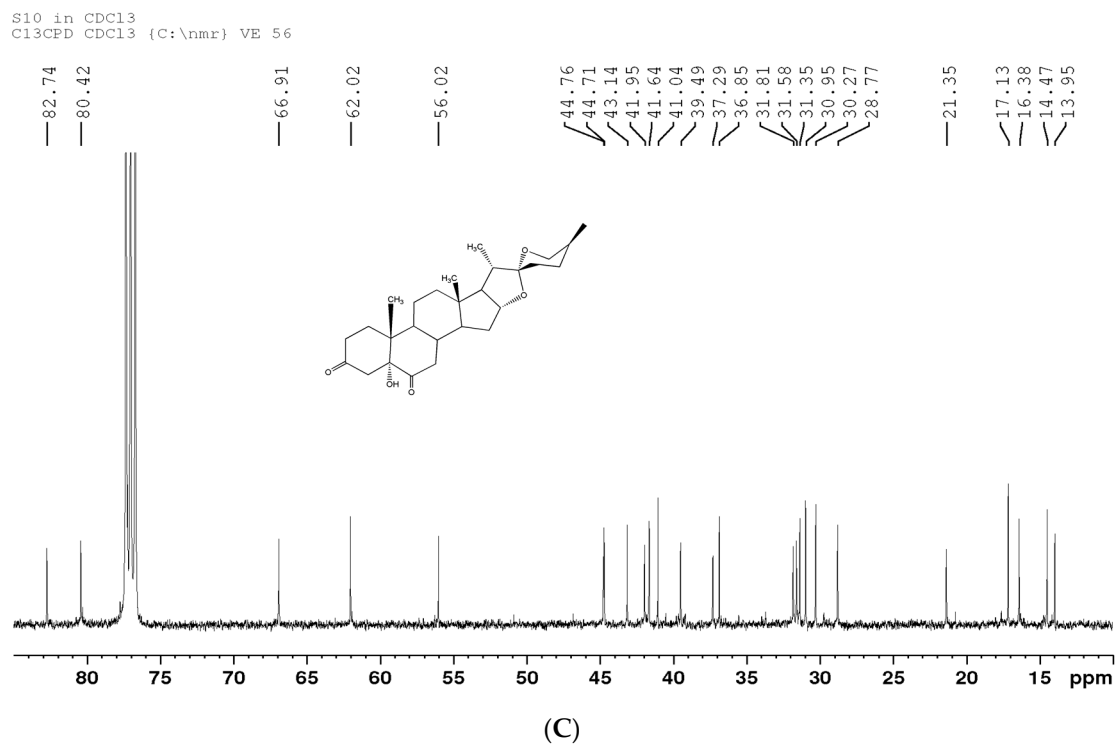

Figure S5. NMR spectroscopic data for compound S15. (A) <sup>1</sup>H-NMR; (B) and (C) <sup>13</sup>C-NMR.
